# Supplementary material for: Comparative Genomics Identifies the Mouse Bmp3 Promoter and an Upstream Evolutionary Conserved Region (ECR) in Mammals
Source: PLoS One. 2013 Feb 22;8(2):e57840. doi: 10.1371/journal.pone.0057840 (PMC3579780; doi:10.1371/journal.pone.0057840)
Supplement: Table S5 — Conservation analysis of the minimal Bmp3 upstream Evolutionary Conserved Region (minECR) in all available animal genomes. (XLS) [file pone.0057840.s007.xls]

## Sheet: Mouse genomic locations
			NM_173404.3	ECRBrowser (mm9)		NT_109320.5 (Chromosome 5)		NW_001030796.1 (Chromosome 5, Celera)
				Factor:	76527873	5'	3'	5'	3'
	Reverse Primer	ATAAGCTTTAAGGCAGCTGGAGCAAG	64-47	99283521	99283504	22755648	22755631	3018217	3018200
	2.8 kb Primer	ACTCGAGTATTGAGCTCTGAAGTCCCC	-	99280637	99280657	22752764	22752784	3015333	3015353
		Length (including Ex1)		2884
		Length (excluding Ex1)		2820
	1.7 kb Primer	ACTCGAGGGCAACAAATTGTGCAGTGG		99281661	99281682	22753788	22753809	3016357	3016378
		Length (including Ex1)		1860
		Length (excluding Ex1)		1796
	0.8 kb Primer	ACTCGAGCTACGGCCCATGATTTGTGA		99282658	99282677	22754785	22754804	3017354	3017373
		Length (including Ex1)		863
		Length (excluding Ex1)		799
	0.6 kb Primer	ACTCGAGGTTTCTCTGACACCATAGGGTGC		99282835	99282857	22754962	22754984	3017531	3017553
		Length (including Ex1)		686
		Length (excluding Ex1)		622
	0.2 kb Primer	ACTCGAGCTGCTACTTGCCTCTGCCT		99283301	99283319	22755428	22755446	3017997	3018015
		Length (including Ex1)		220
		Length (excluding Ex1)		156

## Sheet: Identities by BLAST (5kb v 5kb)
Table S5. Conservation analysis of the minimal Bmp3 upstream Evolutionary Conserved Region (minECR) in all available animal genomes. Alignments were generated using BLASTN (Version 2.2.26+) between the consensus Bmp3 upstream minECR and all 191 available animal whole-genome shotgun assemblies. The Bmp3 upstream minECR was identified in 47 out of 55 eutherian mammals (shown below are the species f…
		Accession Number	minECR
			Location	% Identity
Rodentia	I. tridecemlineatus	AAQQ01245458.1 (GenBank)	1640..1876	0.94
	J. jaculus	AKZC01066311.1 (GenBank)	15821..16101	0.81
	O. degus	AJSA01188215.1 (GenBank)	24022..24316	0.81
	C. lanigera	AGCD01031492.1 (GenBank)	38242..38510	0.79
	H. glaber	AFSB01011057.1 (GenBank)	19812..20079	0.78
Primates	P. paniscus	NW_003870640.1 (RefSeq)	16025895..16025599, complement	0.97
	O. garnettii	NW_003852434.1 (RefSeq)	8410725..8410433	0.88
	G. gorilla gorilla	CABD02274201.1 (GenBank)	80273..80569	0.96
	D. madagascariensis	AGTM011843047.1 (GenBank)	1780..2075	0.95
	M. fascicularis	AEHL01331149.1 (GenBank)	9665..9368, complement	0.96
	P. anubis	AHZZ01080600.1 (GenBank)	34044..33747, complement	0.95
	S. boliviensis boliviensis	AGCE01024113.1 (GenBank)	12547..12843	0.94
Cetartiodactyla	V. pacos	ABRR01010950.1 (GenBank)	612..903	0.91
	B. indicus	AGFL01060630.1 (GenBank)	20097..20390	0.92
	B. grunniens mutus	AGSK01131780.1 (GenBank)	2554..2261, complement	0.92
	O. aries	ACIV010660695.1 (GenBank)	710..1003	0.92
	T. truncatus	ABRN02409159.1 (GenBank)	269..358	0.96
Other Orders	F. catus	AANG02027309.1 (GenBank)	38955..39253	0.87
	M. putorius furo	AEYP01090841.1 (GenBank)	1065..769, complement	0.87
	C. simum simum	AKZM01025862.1 (GenBank)	38413..38706	0.94
	L. africana	NW_003573450.1 (RefSeq)	15634714..15634424, complement	0.83
	O. princeps	AAYZ01190101.1 (GenBank)	10691..10925	0.73
	M. lucifugus	AAPE02007580.1 (GenBank)	121300..121600	0.84
	E. fuscus	ALEH01048256.1 (GenBank)	13800..13509, complement	0.84
	P. vampyrus	ABRP01206134.1 (GenBank)	15163..15427	0.85
	E. europaeus	AANN01523120.1 (GenBank)	4462..4248, complement	0.74
	C. cristata	AJFV01033771.1 (GenBank)	35683..35389, complement	0.86
	S. araneus	AALT01488665.1 (GenBank)	2240..1948, complement	0.81
	T. belangeri	AAPY01682037.1 (GenBank)	32..328	0.91
	T. manatus latirostris	AHIN01094457.1 (GenBank)	14844..14550	0.89
	D. novemcinctus	AAGV03172648.1 (GenBank)	16473..16762	0.85
